1 **Structural disconnectome mapping of cognitive function in post-stroke patients**

2

3 Knut K. Kolskår<sup>1,2,3,\*</sup>, Kristine M. Ulrichsen<sup>1,2,3</sup>, Genevieve Richard<sup>1</sup>, Erlend S. Dørum<sup>1,2,3</sup>, Michel  
4 Thiebaut de Schotten<sup>4,5</sup>, Jaroslav Rokicki<sup>1,2,14</sup>, Jennifer Monereo-Sánchez<sup>1,6,7</sup>, Andreas Engvig<sup>8,9</sup>,  
5 Hege Ihle Hansen<sup>10</sup>, Jan Egil Nordvik,<sup>11,15</sup> Lars T. Westlye<sup>1,2,12</sup>, Dag Alnæs<sup>1,13</sup>

6

7 <sup>1</sup> NORMENT, Division of Mental Health and Addiction, Oslo University Hospital & Institute of  
8 Clinical Medicine, University of Oslo, Norway

9 <sup>2</sup> Department of Psychology, University of Oslo, Norway

10 <sup>3</sup> Sunnaas Rehabilitation Hospital HT, Nesodden, Norway

11 <sup>4</sup> Brain Connectivity and Behaviour Laboratory, Sorbonne Universities, Paris, France

12 <sup>5</sup> Groupe d'Imagerie Neurofonctionnelle, Institut des Maladies Neurodégénératives- UMR 5293,  
13 CNRS, CEA University of Bordeaux, Bordeaux, France

14 <sup>6</sup> Faculty of Health, Medicine and Life Sciences, Maastricht University, Netherlands

15 <sup>7</sup> Department of Radiology and Nuclear Medicine, Maastricht University Medical Center,  
16 Netherlands

17 <sup>8</sup> Department of Nephrology, Oslo University Hospital, Ullevål, Norway

18 <sup>9</sup> Department of Medicine, Diakonhjemmet hospital, Norway

19 <sup>10</sup> Department of Neurology, Oslo University Hospital, Norway

20 <sup>11</sup> CatoSenteret Rehabilitation Center, Son, Norway

21 <sup>12</sup> KG Jebsen Centre for Neurodevelopmental Disorders, University of Oslo, Norway

22 <sup>13</sup> Bjørknes College, Oslo, Norway

23 <sup>14</sup> Centre of Research and Education in Forensic Psychiatry, Oslo University Hospital, Oslo,  
24 Norway

25 <sup>15</sup> Faculty of Health Sciences, Oslo Metropolitan University, Norway

26

27 \* Corresponding author: Knut K. Kolskår (kolskaar@gmail.com), Sunnaas sykehus HF  
28 Bjørnemyrveien 11, 1453 Bjørnemyr, Norway

29

### 30 **Funding resources**

31 The current study has been funded by European Research Council under the European Union's  
32 Horizon 2020 research and innovation programme (ERC StG, grant agreement No. 818521/  
33 802998); South-Eastern Norway Regional Health Authority, Grant/Award Numbers: 2014097,  
34 2015044, 2015073, 2019107, 2020086; Norges Forskningsråd, Grant/Award Numbers: 249795,  
35 262372; Norwegian ExtraFoundation for Health and Rehabilitation, Grant/Award Number:  
36 2015/FO5146.

37

### 38 **Conflict of Interest**

39 We declare no competing financial interests. We obtained appropriate ethical approval from the  
40 local ethics committee, and all procedures were in line with the declaration of Helsinki.

41

### 42 **Open science and data availability statement**

43 Relevant scripts and scrambled and anonymized data needed to reconstruct the reported analyses  
44 and results are available on OSF (link below). While the sensitive nature of the data and our current  
45 approvals do not allow for public sharing of real data, anonymized data may be available upon  
46 request to the corresponding author following appropriate data transfer agreements.

47 OSF-repository: [https://osf.io/juwhv/?view\\_only=1096394b4b2b4a51abceea5834d29969](https://osf.io/juwhv/?view_only=1096394b4b2b4a51abceea5834d29969).

48

49 **Keywords:** DTI, stroke, prediction, cognitive sequelae

50

51

52

53

54 **Abstract**

55 Sequelae following stroke represents a significant challenge in current rehabilitation. The location  
56 and size of focal lesions are only moderately predictive of the diverse cognitive outcome after  
57 stroke. One explanation building on recent work on brain networks proposes that the cognitive  
58 consequences of focal lesions are caused by damages to anatomically distributed brain networks  
59 supporting cognition rather than specific lesion locations. To investigate the association between  
60 post-stroke structural disconnectivity and cognitive performance, we estimated individual level  
61 whole-brain disconnectivity probability maps based on lesion maps from 102 stroke patients using  
62 normative data from healthy controls. Cognitive performance was assessed in the whole sample  
63 using Montreal Cognitive Assessment, and a more comprehensive computerized test protocol was  
64 performed on a subset (n=82). Multivariate analysis using Partial Least Squares on the  
65 disconnectome maps revealed that higher disconnectivity in right insular and frontal operculum,  
66 superior temporal gyrus and putamen was associated with poorer MoCA performance, indicating  
67 that lesions in regions connected with these brain regions are more likely to cause cognitive  
68 impairment. Furthermore, our results indicated that disconnectivity within these clusters was  
69 associated with poorer performance across multiple cognitive domains. These findings demonstrate  
70 that the extent and distribution of structural disconnectivity following stroke are sensitive to  
71 cognitive deficits and may provide important clinical information predicting post stroke cognitive  
72 sequelae.

73

74

75

76

77

78

79

80

## 81 **Introduction**

82 The magnitude and characteristics of cognitive impairments following stroke show substantial  
83 individual differences across patients. While some patients show considerable deficits and  
84 subsequent increased risk of neurodegeneration and dementia, others show no observable  
85 impairments. This heterogeneity in cognitive deficits after stroke arise not only from differences in  
86 the localization and extent of focal lesions, but also from potential secondary cascade effects in  
87 terms of altered brain connectivity (Rehme & Grefkes, 2013), and alterations of the hierarchical  
88 brain network structure (Stam, 2014). Currently, common predictors of cognitive deficits and  
89 recovery include anatomical location, lesion severity, vascular risk factors, chronic brain pathology  
90 and pre-stroke cognitive impairment (Bentley et al., 2014; Macciocchi, Diamond, Alves, & Mertz,  
91 1998; Munsch et al., 2016; Pendlebury, 2009). However, recent studies indicate added predictive  
92 value of connectivity-based measures, which capture perturbations of brain network connections or  
93 dynamics beyond focal lesion site (Ktena Sofia et al., 2019; Lopes et al., 2021b).

94 In the last decade, a large body of literature has characterized the brain as a complex  
95 network consisting of nodes and their connections, collectively termed the brain connectome.  
96 Building on functional imaging, a coarse parcellation of networks separate the brain in the cingulo-  
97 opercular, frontoparietal, ventral attention and default mode networks, aiding cognitive control. The  
98 cingulo-opercular network is associated with the ability to maintain focus, the ability to sustain top-  
99 down cognitive control across cognitive tasks (Cai et al., 2016; Hilger, Ekman, Fiebach, & Basten,  
100 2017; Uddin, Yeo, & Spreng, 2019; Wilk, Ezekiel, & Morton, 2012), whereas the frontoparietal  
101 network is assumed to guide moment to moment-attentional control (Fassbender et al., 2006;  
102 Majerus, Péters, Bouffier, Cowan, & Phillips, 2018). The ventral attention network serves  
103 reorientation to relevant stimuli outside the scope of current attention (Maurizio Corbetta & Gordon  
104 L Shulman, 2011; Vossel, Geng, & Fink, 2014), while default mode network is commonly  
105 associated with self-referential internal activity, and is commonly downregulated during task

106 engagement (McKiernan, Kaufman, Kucera-Thompson, & Binder, 2003; Vatansever, Manktelow,  
107 Sahakian, Menon, & Stamatakis, 2018). A central property of network nodes is how densely they  
108 are connected. Highly connected nodes, or hubs, are critical for efficient information flow between  
109 brain regions and are thought to play a crucial role in pivoting neural activity across distal brain  
110 regions, allowing for the integration of information required to support cognitive operations (Cole  
111 et al., 2013). Thus, focal damage to any part of a brain network might cause disruptions of distal but  
112 intact brain regions. Indeed, even small lesions in a densely connected hub may cause connectome-  
113 wide perturbations (Aben et al., 2019). Recent studies have therefore moved beyond traditional  
114 lesion-symptom mapping, to include measures of network dysfunction to explain and predict stroke  
115 sequelae (Lim & Kang, 2015; Ulrichsen et al., 2020). Recent findings using the lesion-network  
116 mapping approach suggest that patients with overlapping symptoms have lesions in regions that are  
117 functionally connected and that lesions to brain network hubs or their connecting white matter  
118 pathways are associated with more symptoms (Fox, 2018). This network-based concept has also  
119 been shown to apply to a wide range of brain disorders such as Alzheimer disease, schizophrenia  
120 and multiple sclerosis (Crossley et al., 2014; Stam, 2014; van den Heuvel & Sporns, 2019).

121       Whereas association between functional connectivity following stroke has been investigated  
122 in recent years (Klingbeil, Wawrzyniak, Stockert, & Saur, 2019; Lopes et al., 2021a; Ptak et al.,  
123 2020), less is known regarding structural connectivity. The brain is connected by an intricate web of  
124 white matter (WM) pathways, consisting of bundles of myelinated axons responsible for conveying  
125 signals between brain regions, supporting functional networks. While measuring axonal  
126 disconnections in the living human brain has remained a challenging task, a recent implementation  
127 of diffusion tensor imaging (DTI) based tractography for assessing full-brain connection  
128 probabilities has enabled opportunities for detailed estimation of the connections of one or several  
129 lesions in individual patients (Foulon et al., 2018). Based on normative data from healthy controls,  
130 voxel-wise disconnection probability maps for a particular patient can be derived based on a lesion  
131 map. The extent and distribution of these disconnectivity maps have been shown to correlate with a

132 surrogate biomarker of neuronal damage in patients with MS (Rise et al., 2021) and shown promise  
133 in predicting deficits following stroke (Salvalaggio, De Filippo De Grazia, Zorzi, Thiebaut de  
134 Schotten, & Corbetta, 2020).

135 To test for associations between brain disconnection and cognitive performance, we used  
136 Partial Least Squares analysis (PLS) to map common variance between voxel-wise structural  
137 disconnection probability maps in 102 stroke survivors and their performance on the Montreal  
138 Cognitive assessment (MoCA; Nasreddine et al., 2005). PLS (Krishnan, Williams, McIntosh, &  
139 Abdi, 2011) is well-suited for investigating multivariate associations between neuroimaging  
140 features and non-gaussian behavioral and clinical measures commonly obtained from stroke  
141 patients (Blackburn, Bafadhel, Randall, & Harkness, 2013). Although PLS has been suggested to  
142 display less anatomical specificity, it has shown to produce higher stability in results (Ivanova,  
143 Herron, Dronkers, & Baldo, 2021). Importantly, MoCA have been shown to reliably identify  
144 cognitive impairment in clinical samples (Bernstein, Lacritz, Barlow, Weiner, & DeFina, 2011),  
145 across latent variables related to executive function, language, memory visuospatial skills, working  
146 memory, as well as orientation (Freitas, Simões, Marôco, Alves, & Santana, 2012). Based on the  
147 literature reviewed above, we hypothesized that patients with higher levels of stroke-induced brain  
148 disconnectivity would show poorer cognitive performance, and further anticipated that this  
149 association could not simply be explained by the size and location of the lesion itself. We further  
150 hypothesized that derived scores from the PLS would correlate with a broader cognitive battery  
151 derived for stroke patients (Willer, Pedersen, Forchhammer, & Christensen, 2016). Since previous  
152 studies and existing models of the distributed nature of the neuroanatomical basis of cognitive  
153 functions are sparse, we remained agnostic about the anatomical distribution of the associations  
154 with the disconnectome maps and performed an unbiased full brain analysis with appropriate  
155 corrections for multiple comparisons.

156

157

## 158 **Methods**

159 The present cross-sectional study included participants previously described in detail (Dørum et al.,  
160 2020; Kolskår et al., 2020; Richard et al., 2020; Ulrichsen et al., 2020). Briefly, the sample  
161 comprised 102 stroke survivors from sub-acute (>24h post stroke and in clinical stable condition) to  
162 chronic stage. Inclusion criteria were radiologically documented ischemic or hemorrhagic stroke,  
163 and exclusion criteria were psychiatric conditions (bipolar disorder or schizophrenia), other  
164 neurological conditions including known cognitive impairment pre-stroke, substance abuse, and  
165 contraindications for MRI compatibility. All participants gave their written consent before  
166 participating, and the study was approved by the Regional Committee for Medical and Health  
167 Research Ethics South-East Norway (2014/694 and 2015/1282).

168 Table 1 displays sample demographics as well as time between stroke and MRI and  
169 cognitive assessment.

|                                                                             | <b>Mean</b> | <b>sd</b> | <b>min</b> | <b>max</b> |
|-----------------------------------------------------------------------------|-------------|-----------|------------|------------|
| Age                                                                         | 66.3        | 12.3      | 24         | 87         |
| Sex                                                                         | 74.5% males |           |            |            |
| Education (self-report, years)                                              | 14.6        | 3.3       | 7          | 30         |
| Interval between stroke onset and MRI / MoCA assessment (days)              | 515         | 444       | 1          | 1399       |
| Lesion size (2mm resolution)                                                | 7693        | 24723     | 5          | 30031      |
| Number of lesions                                                           | 3           | 2         | 1          | 12         |
| Interval between stroke onset and CabPad- assessment (days)                 | 634         | 379       | 89         | 1428       |
|                                                                             |             |           |            |            |
| NIHSS (score)                                                               | 1.02        | 1.35      | 0          | 7          |
| Hemispheric distribution Left:39 / Right:41 / Bilateral:19 / Subcortical: 2 |             |           |            |            |
| Time since stroke: Acute: 20 / Subacute: 25 / Chronic:57                    |             |           |            |            |

170 **Table 1.** Summary of clinical and demographic variables. NIHSS: National Institute of Stroke Scale. CapPad:

171 Cognitive Assessment at Bedside for iPad. Acute: Less than seven days since stroke. Subacute: between 7 and 180 days

172 *since stroke. Chronic: more than 180 days since stroke. \* Based on radiological description. Number of lesions and*  
173 *lesion size is based on MNI- normalized lesion masks.*

174

### 175 *Cognitive assessment*

176 Patients were assessed with MoCA (Nasreddine et al., 2005) at time of MRI scanning. At follow-up  
177 (Table 1), a subsample (n=82) were also assessed using CabPad (Willer et al., 2016), a  
178 computerized test battery assessing a range of functions, including motor speed (finger tapping) for  
179 dominant and non-dominant hand, verbal fluency (phonetic and semantic word generation),  
180 attention span (symbol sequencing), working memory (reversed symbol sequencing), a spatial  
181 Stroop / flanker task, spatial short-term memory and psychomotor speed (symbol-digit coding task).

182

### 183 *MRI acquisition*

184 Patients were scanned at Oslo University Hospital on a 3T GE 750 Discovery MRI scanner  
185 with a 32-channel head coil. T2-FLAIR images were acquired with the following parameters: TR:  
186 8000 ms; TE: 127 ms, TI: 2240 ms; flip angle (FA): 90°; voxel size: 1x1x1 mm. T1-weighted scans  
187 were collected using a 3D IR-prepared FSPGR (BRAVO) sequence (TR: 8.16 ms; TE: 3.18 ms; TI:  
188 450 ms; FA: 12°; voxel size: 1×1×1 mm; FOV: 256 x 256, 188 sagittal slices) for co-registration.

189

### 190 *Lesion delineation*

191 Lesion delineation was initially guided on each participant's FLAIR image, using the semi-  
192 automated Clusterize-Toolbox, implemented in MATLAB (de Haan, Clas, Juenger, Wilke, &  
193 Karnath, 2015), before finalized by manual demarcation. The demarcation was guided by  
194 radiological descriptions, and evaluated by a medical doctor before finalization. Normalization  
195 parameters were estimated by linear registration of the structural T1-image to the MNI152-template  
196 and applied to the lesion masks using Flirt (Jenkinson & Smith, 2001). Figure 1 displays overlap in  
197 lesion location across the sample.



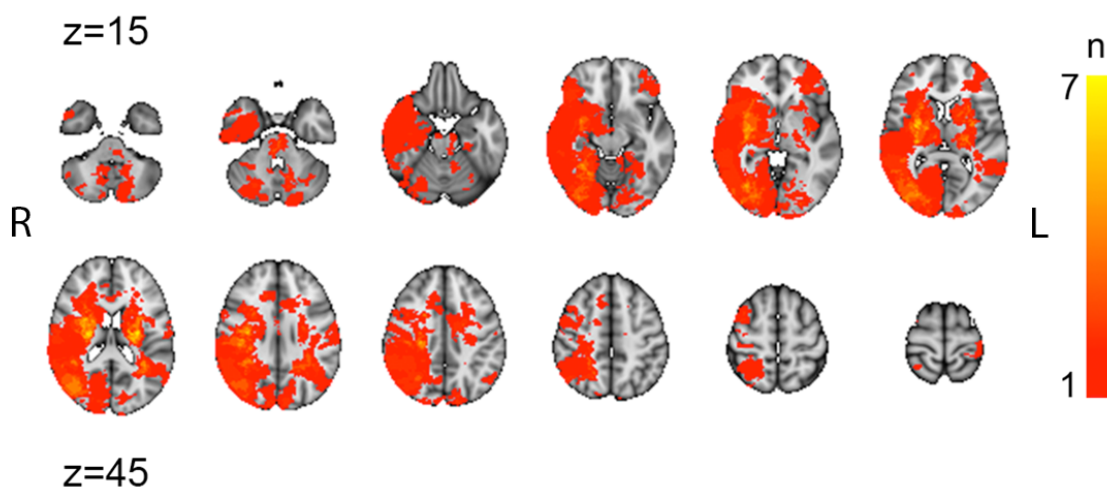

198

199 **Figure 1.** Lesion overlap across 102 stroke patients. 12 transversal slices, with 5 mm thickness. Color scale indicates  
200 number of participants overlapping. Z coordinates denotes transversal slices in the MNI152-coordinate system.

201

202 *Group comparisons.*

203 To assess group differences in MoCA-score between the patients in acute, subacute and chronic  
204 phase, a linear model was estimated with MoCA-score as dependent variable, and group as  
205 independent variable. To assess impact of lesion load, a linear model was estimated with MoCA-  
206 score as dependent variable and lesion size and number of lesions as independent variables.

207

208 *Estimation of structural disconnectome maps*

209 To estimate the extent of the structural disconnection for each patient, we employed an automated  
210 tractography-based procedure (Foulon et al., 2018). Briefly, full-brain tractography data of 170  
211 healthy controls from the 7T Human Connectome Project was used as a normative training set to  
212 identify fibers passing through each lesion (Thiebaut de Schotten, Foulon, & Nachev, 2020). Using  
213 affine and diffeomorphic deformations (Avants et al., 2011; Klein et al., 2009), individual patient's  
214 lesion maps were registered to each control's native space and used as seeds for the probabilistic  
215 tractography in Trackvis (Wang, Benner, Sorensen, & Wedeen, 2007). The resulting tractograms  
216 were transformed to visitation maps, binarized, and registered to MNI152 space before a percentage  
217 overlap map was produced by summarizing each point in the normalized healthy subject visitation

218 maps. The resulting disconnectome maps are whole-brain voxel-wise probability maps indicating  
219 for each patient and for each voxel in the brain the probability that the voxels were disconnected.  
220 Next, these individual-level disconnection maps were included in group-level analysis.

221

#### 222 *Statistical analysis*

223 To assess associations between MoCA scores and disconnectome maps, we used non-rotated task-  
224 based PLS using PLS Application (Krishnan, Williams Lj Fau - McIntosh, McIntosh Ar Fau - Abdi,  
225 & Abdi, 2010) for MATLAB (MathWorks, 2018), entering female, age and MoCA score as  
226 behavioral variables, with contrasts for mean effects for each (1 0 0; 0 1 0; 0 0 1). We performed  
227 permutations (n=1000) to assess the significance of the estimated latent variables, while precision  
228 was estimated using bootstrapping (n=1000) and used to calculate pseudo-z or bootstrap ratio brain  
229 maps (McIntosh & Lobaugh, 2004).

230 To assess associations with cognitive performance, disconnectivity within each significant  
231 PLS cluster associated with MoCA was extracted and correlated with CabPad performance.

232

#### 233 **Results**

234 Figure 2 displays patient distribution of MoCA-scores. 35% of the patients fulfilled criteria for mild  
235 cognitive impairment, based on a suggested cutoff at 26 (Nasreddine et al., 2005).

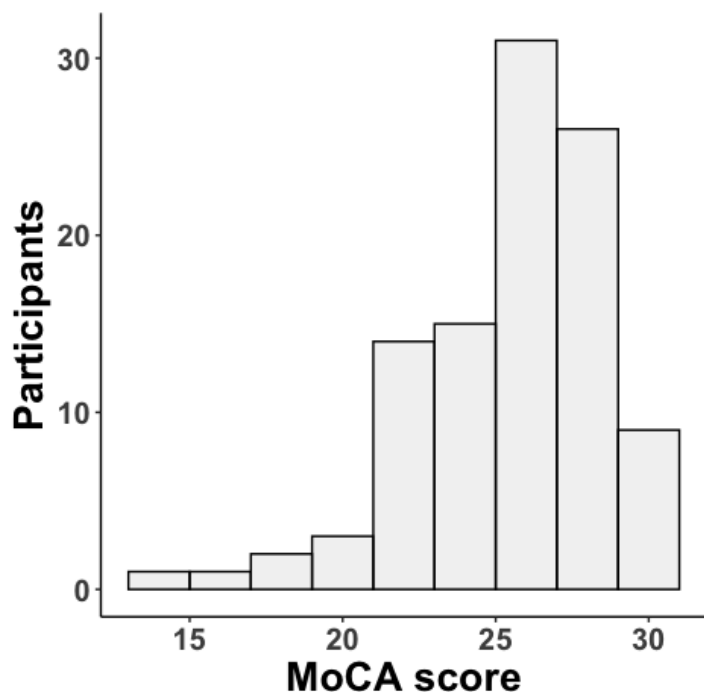

236

237 **Figure 2.** Histogram depicting the distribution of MoCA scores across the sample.

238

239 Investigation of association between group and MoCA performance revealed no significant  
240 relationship ( $F=1.8$ ,  $p=0.17$ , Figure 3). All participants were therefore pooled for further analysis.

241 Investigation of association between MoCA score and lesion load identified a significant  
242 association between total lesion volume and MoCA score ( $t=-2.96$ ,  $p=0.004$ ), but not with number  
243 of lesions ( $t=-1.502$ ,  $p=0.13$ ). However, after removal of one participant with an extreme lesion  
244 size, the association between MoCA and lesion volume did not remain significant ( $t=-1.7$ ,  $p=0.09$ ).

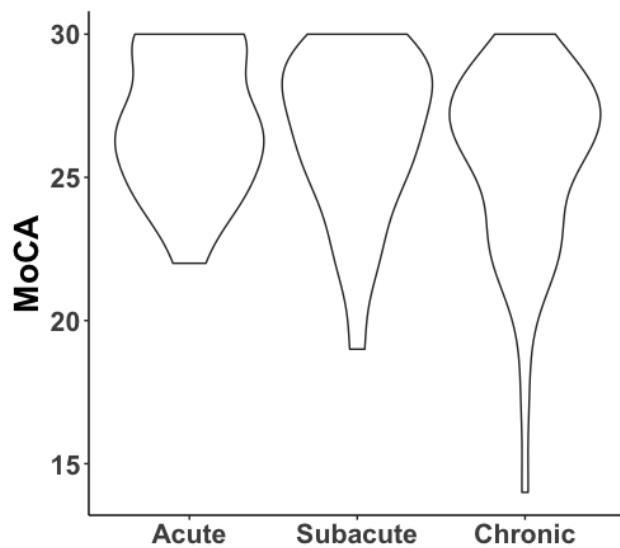

245

246 **Figure 3.** Distribution of MoCA scores by patient group.

247

248 Figure 4 and Table 2 summarize the results from the PLS. Briefly, permutation testing revealed  
 249 three significant clusters (pseudo- $z > 3$ ) showing common variance between MoCA performance  
 250 and structural disconnectivity, including 1) right frontal operculum/insular cortex, 2) right superior  
 251 temporal gyrus, and 3) the right putamen. Of note, association between lesion size and individual  
 252 PLS brain scores remained highly similar after removal of an individual with an extreme lesion size  
 253 (included:  $t=-9.1$ ,  $p=7.6e-15$ , excluded:  $t=-7.4$ ,  $p=5.13e-11$ ), indicating that our main results within  
 254 the PLS was not strongly driven by the outlier.

255

256

| Cluster-# | Location                                             | Size mm <sup>3</sup> | Max pseudo-Z | X, Y, Z (vox) |
|-----------|------------------------------------------------------|----------------------|--------------|---------------|
| 1         | Right frontal operculum/insula                       | 1063                 | 4.09         | [25, 75, 33]  |
| 2         | Right superior temporal gyrus,<br>posterior division | 273                  | 3.65         | [15, 48, 41]  |
| 3         | Right putamen                                        | 37                   | 3.61         | [34, 68, 32]  |

257 **Table 2.** Disconnectome clusters significantly associated with MoCA performance, identified by PLS analysis.

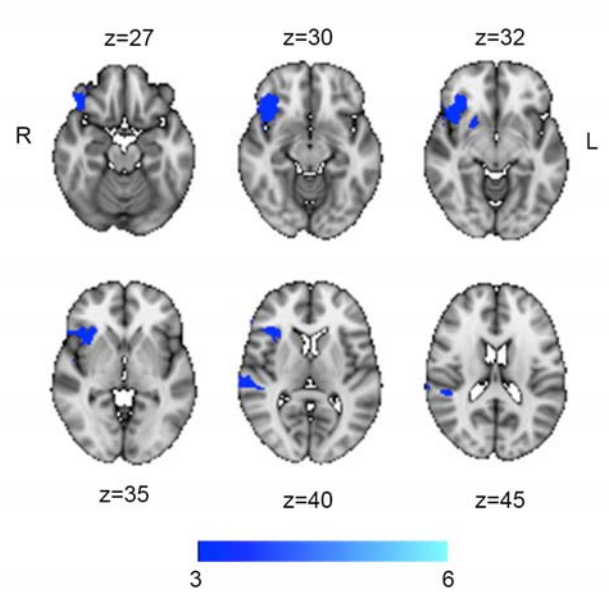

258

259 **Figure 4.** Voxel-wise disconnectome bootstrap ratio maps for the MoCA association, thresholded at pseudo- $z > 3$ .

260

261 Figure 5 illustrates correlations between disconnectivity within each of the significant clusters

262 identified by MoCa-PLS and CabPad performance. Disconnectivity was negatively associated with

263 performance on all tests, with strongest correlations for semantic and phonetic fluency.

264

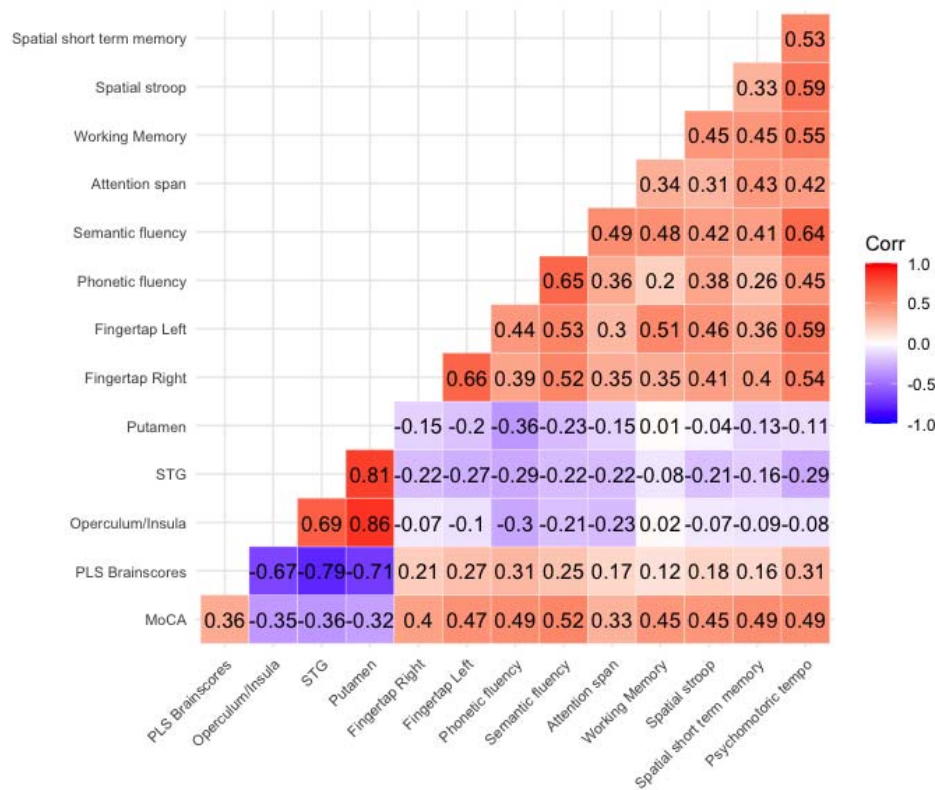

265

266 **Figure 5.** Correlation between MoCA, PLS-weights, disconnectivity within the significant clusters, and CabPad  
 267 performance.

268

269 **Discussion**

270 In the current study, we investigated associations between individual structural disconnectome  
 271 maps and post-stroke cognitive performance as measured with MoCA in 102 stroke survivors. We  
 272 also performed follow-up investigation assessing cognitive associations with a broader cognitive  
 273 battery on a subsample. Our analysis revealed that structural disconnections implicating the right  
 274 insula and frontal operculum, along with right superior temporal gyrus and right putamen were  
 275 associated with poorer general cognitive performance as measured with MoCA. In a subsample  
 276 comprising 82 of the patients, we demonstrated that the association generalized to a range of  
 277 cognitive domains, including word generation, attention span, and speed. Together, our results  
 278 support the relevance of altered structural connectivity on cognitive impairments following stroke.

279 Stroke frequently cause cognitive impairment, and investigations of the underlying network  
 280 dynamics may add to our current understanding and prognostics. Structural disconnections caused

281 by stroke have been shown to influence functional connectivity both directly and indirectly (Griffis,  
282 Metcalf, Corbetta, & Shulman, 2019, 2020). This suggests a mechanism of cognitive sequelae in  
283 which altered functional connectivity due to structural disruptions cause aberrant function in distal  
284 nodes, where lesions perturbing any part of a network supporting cognitive functions may cause  
285 cognitive and behavioral impairment (Alstott, Breakspear, Haggmann, Cammoun, & Sporns, 2009)  
286 (Chen et al., 2019; Lim & Kang, 2015).

287 A challenge in current healthcare is assessment of cognitive function with a sensitivity and  
288 specificity able to detect and differentiate cognitive difficulties (Dong et al., 2010). MoCA  
289 (Nasreddine et al., 2005) has been suggested as a feasible screening tool for detecting cognitive  
290 impairment following stroke (Horstmann, Rizos T Fau - Rauch, Rauch G Fau - Arden, Arden C Fau  
291 - Veltkamp, & Veltkamp, 2014; Julayanont & Nasreddine, 2017; Munthe-Kaas et al., 2021), where  
292 key advantages are short administration time and multiple cognitive domains of assessment (Burton  
293 & Tyson, 2015; Stolwyk Renerus, O'Neill Megan, McKay Adam, & Wong Dana, 2014).  
294 Importantly, MoCA is sensitive to specific cognitive domains such as attention, executive and  
295 visuospatial function when utilized in lesion-mapping studies (Shi et al., 2018; Zhao et al., 2017).  
296 Of note, post stroke MoCA score has been demonstrated to differentiate cerebral blood flow in  
297 anterior cingulate and prefrontal cortex (Nakaoku et al., 2018). Anterior cingulate is strongly  
298 connected to insula and frontal operculum both structurally (Ghaziri et al., 2017) and functionally  
299 (Horn et al., 2010), and is suggested to be among the core nodes of the cingulo-opercular network.  
300 Importantly, these network nodes are suggested to mediate regulation and differentiation between  
301 the frontoparietal, ventral attention and default mode networks (Goulden et al., 2014; Menon &  
302 Uddin, 2010). The frontoparietal and default mode network are furthermore viewed as  
303 anticorrelated networks reflecting cognitive state, where degree of this differentiation have been  
304 shown to predict cognitive function in stroke survivors at the group (Geranmayeh, Leech, & Wise,  
305 2016) and individual level (Lorenz et al., 2021). Indeed, lesions causing altered connectivity in  
306 cingulo-opercular nodes have been linked to cognitive impairment across multiple domains (Siegel

307 et al., 2016; Warren et al., 2014), including general impairments as measured using MoCA  
308 (Vicentini et al., 2021).

309 Our analysis revealed significant associations between MoCA and disconnectivity in the  
310 right superior temporal gyrus (STG) and a small cluster in the putamen. STG is commonly  
311 associated with language production and interpretation (Brugge, Volkov, Garell, Reale, & Howard,  
312 2003), and has also been found to be activated in conjunction with insula during evaluation of  
313 responses in decision-making tasks (Megías, Cándido, Maldonado, & Catena, 2018; Paulus,  
314 Feinstein, Leland, & Simmons, 2005), where information needs to be integrated and evaluated over  
315 longer periods. STG has also been found to coactivate with visual attention, frontoparietal and  
316 cingulo-opercular nodes during reorientation of visual attention (Vossel et al., 2014), suggesting a  
317 more general role in attentional processing.

318 Putamen is involved in various aspects of motor functioning and learning, including  
319 language functions and reward signaling. The putamen is connected to thalamic and motor cortices  
320 (Jung et al., 2014; Leh, Ptito, Chakravarty, & Strafella, 2007), and is strongly connected to the  
321 frontoparietal network where the integrity of the connecting pathway is correlated with executive  
322 functioning in healthy adults (Bennett & Madden, 2014; Ystad et al., 2011). These results together  
323 suggests that post-stroke cognitive dysfunction may partly arise from lack of differentiation  
324 between large-scale brain networks. Our results align with this understanding, as structural  
325 disconnectivity of the insula and operculum was associated with impaired MoCA performance,  
326 potentially through disrupted network regulation.

327 Expanding our results, disconnectivity within the MoCA-associated clusters correlated with  
328 performance across several cognitive domains as measured by CabPad. While the apparent lack of  
329 cognitive specificity within and across clusters may reflect that the disconnectome approach  
330 captures a more over-arching impairment, strongest correlations were seen with phonetic and  
331 semantic generation and visual attention span. Phonetic and semantic fluency reflect executive  
332 functioning beyond pure language generation (Delis, Kramer, Kaplan, & Holdnack, 2004), and



333 greater functional connectivity within the cingulo-opercular and ventral attention network has been  
334 associated with reading fluency.

335 Our results revealed significant associations within the right hemisphere only. A recent  
336 investigation of structural connectivity in patients with ischemic leukoaraiosis found predominantly  
337 right side altered graph metrics when compared to healthy controls, and reported associations with  
338 cognitive performance (Lu et al., 2021). Comparably, right side functional abnormalities in cingulo-  
339 opercular nodes during resting state have been associated with impaired MoCA performance  
340 following a transient ischemic attack (Guo et al., 2014), and right side dominance in bilateral insula  
341 activation is robustly found during task engagement in healthy controls (Rottschy et al., 2012).  
342 Further, right hemisphere is to a larger degree linked to visual attention, reorientation, and bottom-  
343 up processing, and damage to right side pathways associated with impaired spatial attention, target  
344 detection and vigilance (Maurizio Corbetta & Gordon L. Shulman, 2011). Albeit speculative, our  
345 results indicate a larger right-side vulnerability for abrupted structural connectivity augmenting post  
346 stroke cognitive difficulties.

347 The current study has limitations. First, our cross-sectional design does not allow for  
348 integrating premorbid cognitive function and chronic brain pathology, which is highly relevant as  
349 an outcome predictor (Sagnier & Sibon, 2019). Further, the current sample represents a  
350 heterogeneous group regarding stroke severity, we lack measures on vascular risk and the sample  
351 size is moderate, factors that are relevant for the generalizability of the reported findings to the  
352 stroke population in general (Marek et al., 2020). Of note, our data did not allow for differentiation  
353 between stroke reported at hospital admittance and potential older strokes reported in the  
354 radiological description. We can therefore not rule out the possibility that the associations are partly  
355 driven by previous strokes in some of the patients. Further, jointly estimating all voxels in a single  
356 PLS model increases sensitivity, however, comes with a trade-off in spatial specificity as we can  
357 only make statements about significance for the spatial pattern as a whole. PLS has shown  
358 comparable performance compared to similar multivariate lesion symptom mapping approaches, it

359 has shown to display less anatomical specificity, warranting caution when interpreting spatially  
360 sparse clusters (Ivanova et al., 2021). Still, the reliability of each voxel's contribution to the  
361 observed pattern was assessed through bootstrapping. While the follow-up association between  
362 brain scores and the broader CabPad-battery may indicate whether the MoCa-driven PLS-  
363 decomposition is driven by general or more specific cognitive domains, it cannot capture novel  
364 associations not initially captured by the MoCA. Although MoCA has been shown to display  
365 adequate sensitivity and specificity to detect mild cognitive impairment, it does not offer a  
366 comprehensive assessment. Indeed, lack of specificity and variability in difficulty increases the  
367 likelihood to overlook minor cognitive difficulties. Indeed, MoCA only provide a crude proxy for  
368 cognitive impairment, and does not allow for drawing inference on broad cognitive abilities. Of  
369 note, premorbid cognitive function is associated with post stroke outcome. In the current data  
370 collection we did not obtain measures allowing for estimation of premorbid function” In  
371 conclusion, our study supports the relevance of investigating disrupted structural connectivity  
372 following stroke. Although our study does not allow differentiation between proximal and distal  
373 effects due to sample size and lesion homogeneity, our results highlight the relevance of altered  
374 structural connectivity when investigating cognitive sequelae after stroke. In line with previous  
375 studies, our results indicate lesions affecting the insula and the frontal operculum are associated  
376 with cognitive impairment and support the inclusion of measures of structural disconnection when  
377 evaluating cognitive and functional sequelae in stroke patients.

378

## 379 **References**

- 380 Aben, H. P., Biessels, G. J., Weaver, N. A., Spikman, J. M., Visser-Meily, J. M. A., de Kort, P. L.  
381 M., . . . Jansen, B. P. W. (2019). Extent to Which Network Hubs Are Affected by Ischemic  
382 Stroke Predicts Cognitive Recovery. *Stroke*, *50*(10), 2768-2774.  
383 doi:10.1161/STROKEAHA.119.025637
- 384 Alstott, J., Breakspear, M., Hagmann, P., Cammoun, L., & Sporns, O. (2009). Modeling the Impact  
385 of Lesions in the Human Brain. *PLoS computational biology*, *5*(6), e1000408.  
386 doi:10.1371/journal.pcbi.1000408
- 387 Avants, B. B., Tustison, N. J., Song, G., Cook, P. A., Klein, A., & Gee, J. C. (2011). A reproducible  
388 evaluation of ANTs similarity metric performance in brain image registration. *NeuroImage*,  
389 *54*(3), 2033-2044. doi:<https://doi.org/10.1016/j.neuroimage.2010.09.025>

- 390 Bennett, I. J., & Madden, D. J. (2014). Disconnected aging: Cerebral white matter integrity and age-  
391 related differences in cognition. *Neuroscience*, 276, 187-205.  
392 doi:<https://doi.org/10.1016/j.neuroscience.2013.11.026>
- 393 Bentley, P., Kumar, G., Rinne, P., Buddha, S., Kallingal, J., Hookway, C., . . . Beckmann, C.  
394 (2014). Lesion locations influencing baseline severity and early recovery in ischaemic  
395 stroke. *European Journal of Neurology*, 21(9), 1226-1232. doi:10.1111/ene.12464
- 396 Bernstein, I. H., Lacritz, L., Barlow, C. E., Weiner, M. F., & DeFina, L. F. (2011). Psychometric  
397 Evaluation of the Montreal Cognitive Assessment (MoCA) in Three Diverse Samples. *The*  
398 *Clinical Neuropsychologist*, 25(1), 119-126. doi:10.1080/13854046.2010.533196
- 399 Blackburn, D. J., Bafadhel, L., Randall, M., & Harkness, K. A. (2013). Cognitive screening in the  
400 acute stroke setting. *Age and ageing*, 42(1), 113-116. doi:10.1093/ageing/afs116
- 401 Brugge, J. F., Volkov, I. O., Garell, P. C., Reale, R. A., & Howard, M. A. (2003). Functional  
402 Connections Between Auditory Cortex on Heschl's Gyrus and on the Lateral Superior  
403 Temporal Gyrus in Humans. *Journal of Neurophysiology*, 90(6), 3750-3763.  
404 doi:10.1152/jn.00500.2003
- 405 Burton, L., & Tyson, S. F. (2015). Screening for cognitive impairment after stroke: A systematic  
406 review of psychometric properties and clinical utility. *J Rehabil Med*, 47(3), 193-203.  
407 doi:10.2340/16501977-1930
- 408 Cai, W., Chen, T., Ryali, S., Kochalka, J., Li, C.-S. R., & Menon, V. (2016). Causal Interactions  
409 Within a Frontal-Cingulate-Parietal Network During Cognitive Control: Convergent  
410 Evidence from a Multisite–Multitask Investigation. *Cerebral cortex*, 26(5), 2140-2153.  
411 doi:10.1093/cercor/bhv046
- 412 Chen, H., Shi, M., Zhang, H., Zhang, Y.-D., Geng, W., Jiang, L., . . . Yin, X. (2019). Different  
413 Patterns of Functional Connectivity Alterations Within the Default-Mode Network and  
414 Sensorimotor Network in Basal Ganglia and Pontine Stroke. *Medical science monitor :  
415 international medical journal of experimental and clinical research*, 25, 9585-9593.  
416 doi:10.12659/MSM.918185
- 417 Cole, M. W., Reynolds, J. R., Power, J. D., Repovs, G., Anticevic, A., & Braver, T. S. (2013).  
418 Multi-task connectivity reveals flexible hubs for adaptive task control. *Nature Neuroscience*,  
419 16(9), 1348-1355. doi:10.1038/nn.3470
- 420 Corbetta, M., & Shulman, G. L. (2011). Spatial Neglect and Attention Networks. *Annual Review of*  
421 *Neuroscience*, 34(1), 569-599. doi:10.1146/annurev-neuro-061010-113731
- 422 Corbetta, M., & Shulman, G. L. (2011). Spatial neglect and attention networks. *Annual Review of*  
423 *Neuroscience*, 34, 569-599.
- 424 Crossley, N. A., Mechelli, A., Scott, J., Carletti, F., Fox, P. T., McGuire, P., & Bullmore, E. T.  
425 (2014). The hubs of the human connectome are generally implicated in the anatomy of brain  
426 disorders. *Brain*, 137(8), 2382-2395. doi:10.1093/brain/awu132
- 427 de Haan, B., Clas, P., Juenger, H., Wilke, M., & Karnath, H.-O. (2015). Fast semi-automated lesion  
428 demarcation in stroke. *NeuroImage. Clinical*, 9, 69-74. doi:10.1016/j.nicl.2015.06.013
- 429 Delis, D. C., Kramer, J. H., Kaplan, E., & Holdnack, J. (2004). Reliability and validity of the Delis-  
430 Kaplan Executive Function System: An update. *Journal of the International*  
431 *Neuropsychological Society*, 10(2), 301-303. doi:10.1017/S1355617704102191
- 432 Dong, Y., Sharma, V. K., Chan, B. P.-L., Venketasubramanian, N., Teoh, H. L., Seet, R. C. S., . . .  
433 Chen, C. (2010). The Montreal Cognitive Assessment (MoCA) is superior to the Mini-  
434 Mental State Examination (MMSE) for the detection of vascular cognitive impairment after  
435 acute stroke. *Journal of the Neurological Sciences*, 299(1), 15-18.  
436 doi:<https://doi.org/10.1016/j.jns.2010.08.051>
- 437 Dørum, E. S., Kaufmann, T., Alnæs, D., Richard, G., Kolskår, K. K., Engvig, A., . . . Westlye, L. T.  
438 (2020). Functional brain network modeling in sub-acute stroke patients and healthy controls  
439 during rest and continuous attentive tracking. *Heliyon*, 6(9), e04854.  
440 doi:<https://doi.org/10.1016/j.heliyon.2020.e04854>

- 441 Fassbender, C., Simoes-Franklin, C., Murphy, K., Hester, R., Meaney, J., Robertson, I. H., &  
442 Garavan, H. (2006). The Role of a Right Fronto-Parietal Network in Cognitive Control.  
443 *Journal of Psychophysiology*, 20(4), 286-296. doi:10.1027/0269-8803.20.4.286
- 444 Foulon, C., Cerliani, L., Kinkingnéhun, S., Levy, R., Rosso, C., Urbanski, M., . . . Thiebaut de  
445 Schotten, M. (2018). Advanced lesion symptom mapping analyses and implementation as  
446 BCBtoolkit. *GigaScience*, 7(3). doi:10.1093/gigascience/giy004
- 447 Fox, M. D. (2018). Mapping Symptoms to Brain Networks with the Human Connectome. *New*  
448 *England Journal of Medicine*, 379(23), 2237-2245. doi:10.1056/NEJMra1706158
- 449 Freitas, S., Simões, M. R., Marôco, J., Alves, L., & Santana, I. (2012). Construct Validity of the  
450 Montreal Cognitive Assessment (MoCA). *Journal of the International Neuropsychological*  
451 *Society*, 18(2), 242-250. doi:10.1017/S1355617711001573
- 452 Geranmayeh, F., Leech, R., & Wise, R. J. S. (2016). Network dysfunction predicts speech  
453 production after left hemisphere stroke. *Neurology*, 86(14), 1296.  
454 doi:10.1212/WNL.0000000000002537
- 455 Ghaziri, J., Tucholka, A., Girard, G., Houde, J.-C., Boucher, O., Gilbert, G., . . . Nguyen, D. K.  
456 (2017). The Corticocortical Structural Connectivity of the Human Insula. *Cerebral cortex*,  
457 27(2), 1216-1228. doi:10.1093/cercor/bhv308
- 458 Goulden, N., Khusnulina, A., Davis, N. J., Bracewell, R. M., Bokde, A. L., McNulty, J. P., &  
459 Mullins, P. G. (2014). The salience network is responsible for switching between the default  
460 mode network and the central executive network: Replication from DCM. *NeuroImage*, 99,  
461 180-190. doi:<https://doi.org/10.1016/j.neuroimage.2014.05.052>
- 462 Griffis, J. C., Metcalf, N. V., Corbetta, M., & Shulman, G. L. (2019). Structural Disconnections  
463 Explain Brain Network Dysfunction after Stroke. *Cell Reports*, 28(10), 2527-2540.e2529.  
464 doi:<https://doi.org/10.1016/j.celrep.2019.07.100>
- 465 Griffis, J. C., Metcalf, N. V., Corbetta, M., & Shulman, G. L. (2020). Damage to the shortest  
466 structural paths between brain regions is associated with disruptions of resting-state  
467 functional connectivity after stroke. *NeuroImage*, 210, 116589.  
468 doi:<https://doi.org/10.1016/j.neuroimage.2020.116589>
- 469 Guo, J., Chen, N., Li, R., Wu, Q., Chen, H., Gong, Q., & He, L. (2014). Regional homogeneity  
470 abnormalities in patients with transient ischaemic attack: A resting-state fMRI study.  
471 *Clinical Neurophysiology*, 125(3), 520-525. doi:<https://doi.org/10.1016/j.clinph.2013.08.010>
- 472 Hilger, K., Ekman, M., Fiebach, C. J., & Basten, U. (2017). Efficient hubs in the intelligent brain:  
473 Nodal efficiency of hub regions in the salience network is associated with general  
474 intelligence. *Intelligence*, 60, 10-25. doi:<https://doi.org/10.1016/j.intell.2016.11.001>
- 475 Horn, D. I., Yu, C., Steiner, J., Buchmann, J., Kaufmann, J., Osoba, A., . . . He, H. (2010).  
476 Glutamatergic and resting-state functional connectivity correlates of severity in major  
477 depression—the role of pregenual anterior cingulate cortex and anterior insula. *Frontiers in*  
478 *systems neuroscience*, 4, 33.
- 479 Horstmann, S., Rizos T Fau - Rauch, G., Rauch G Fau - Arden, C., Arden C Fau - Veltkamp, R., &  
480 Veltkamp, R. (2014). Feasibility of the Montreal Cognitive Assessment in acute stroke  
481 patients. *Eur J Neurol*, 21(11)(1468-1331 (Electronic)). doi:10.1111/ene.12505
- 482 Ivanova, M. V., Herron, T. J., Dronkers, N. F., & Baldo, J. V. (2021). An empirical comparison of  
483 univariate versus multivariate methods for the analysis of brain-behavior mapping. *Human*  
484 *Brain Mapping*, 42(4), 1070-1101.
- 485 Jenkinson, M., & Smith, S. (2001). A global optimisation method for robust affine registration of  
486 brain images. *Medical Image Analysis*, 5(2), 143-156. doi:[https://doi.org/10.1016/S1361-](https://doi.org/10.1016/S1361-8415(01)00036-6)  
487 [8415\(01\)00036-6](https://doi.org/10.1016/S1361-8415(01)00036-6)
- 488 Julayanont, P., & Nasreddine, Z. S. (2017). Montreal Cognitive Assessment (MoCA): Concept and  
489 Clinical Review. In A. J. Larner (Ed.), *Cognitive Screening Instruments: A Practical*  
490 *Approach* (pp. 139-195). Cham: Springer International Publishing.
- 491 Jung, W. H., Jang, J. H., Park, J. W., Kim, E., Goo, E.-H., Im, O.-S., & Kwon, J. S. (2014).  
492 Unravelling the Intrinsic Functional Organization of the Human Striatum: A Parcellation

- 493 and Connectivity Study Based on Resting-State fMRI. *PloS one*, 9(9), e106768.  
494 doi:10.1371/journal.pone.0106768
- 495 Klein, A., Andersson, J., Ardekani, B. A., Ashburner, J., Avants, B., Chiang, M.-C., . . . Parsey, R.  
496 V. (2009). Evaluation of 14 nonlinear deformation algorithms applied to human brain MRI  
497 registration. *NeuroImage*, 46(3), 786-802.  
498 doi:<https://doi.org/10.1016/j.neuroimage.2008.12.037>
- 499 Klingbeil, J., Wawrzyniak, M., Stockert, A., & Saur, D. (2019). Resting-state functional  
500 connectivity: An emerging method for the study of language networks in post-stroke  
501 aphasia. *Brain and Cognition*, 131, 22-33. doi:<https://doi.org/10.1016/j.bandc.2017.08.005>
- 502 Kolskår, K. K., Richard, G., Alnæs, D., Dørum, E. S., Sanders, A.-M., Ulrichsen, K. M., . . .  
503 Westlye, L. T. (2020). Reliability, sensitivity, and predictive value of fMRI during multiple  
504 object tracking as a marker of cognitive training gain in combination with tDCS in stroke  
505 survivors. *Human Brain Mapping*, n/a(n/a). doi:<https://doi.org/10.1002/hbm.25284>
- 506 Krishnan, A., Williams Lj Fau - McIntosh, A. R., McIntosh Ar Fau - Abdi, H., & Abdi, H. (2010).  
507 Partial Least Squares (PLS) methods for neuroimaging: a tutorial and review. *NeuroImage*,  
508 15;56(2)(1095-9572 (Electronic)), 455-475. doi:10.1016/j.neuroimage.2010.07.034.
- 509 Krishnan, A., Williams, L. J., McIntosh, A. R., & Abdi, H. (2011). Partial Least Squares (PLS)  
510 methods for neuroimaging: a tutorial and review. *Neuroimage*, 56(2), 455-475.  
511 doi:10.1016/j.neuroimage.2010.07.034
- 512 Ktena Sofia, I., Schirmer Markus, D., Etherton Mark, R., Giese, A.-K., Tuozzo, C., Mills Brittany,  
513 B., . . . Rost Natalia, S. (2019). Brain Connectivity Measures Improve Modeling of  
514 Functional Outcome After Acute Ischemic Stroke. *Stroke*, 50(10), 2761-2767.  
515 doi:10.1161/STROKEAHA.119.025738
- 516 Leh, S. E., Ptito, A., Chakravarty, M. M., & Strafella, A. P. (2007). Fronto-striatal connections in  
517 the human brain: A probabilistic diffusion tractography study. *Neuroscience Letters*, 419(2),  
518 113-118. doi:<https://doi.org/10.1016/j.neulet.2007.04.049>
- 519 Lim, J.-S., & Kang, D.-W. (2015). Stroke Connectome and Its Implications for Cognitive and  
520 Behavioral Sequela of Stroke. *Journal of stroke*, 17(3), 256-267.  
521 doi:10.5853/jos.2015.17.3.256
- 522 Lopes, R., Bournonville, C., Kuchcinski, G., Dondaine, T., Mendyk, A.-M., Viard, R., . . . Bordet,  
523 R. (2021a). Prediction of Long-term Cognitive Function After Minor Stroke Using  
524 Functional Connectivity. *Neurology*, 96(8), e1167. doi:10.1212/WNL.0000000000011452
- 525 Lopes, R., Bournonville, C., Kuchcinski, G., Dondaine, T., Mendyk, A.-M., Viard, R., . . . Bordet,  
526 R. (2021b). Prediction of Long-term Cognitive Functions after Minor Stroke, Using  
527 Functional Connectivity. *Neurology*, 10.1212/WNL.0000000000011452.  
528 doi:10.1212/WNL.0000000000011452
- 529 Lorenz, R., Johal, M., Dick, F., Hampshire, A., Leech, R., & Geranmayeh, F. (2021). A Bayesian  
530 optimization approach for rapidly mapping residual network function in stroke. *Brain*,  
531 144(7), 2120-2134. doi:10.1093/brain/awab109
- 532 Lu, T., Wang, Z., Cui, Y., Zhou, J., Wang, Y., & Ju, S. (2021). Disrupted Structural Brain  
533 Connectome Is Related to Cognitive Impairment in Patients With Ischemic Leukoaraiosis.  
534 *Frontiers in Human Neuroscience*, 15. doi:10.3389/fnhum.2021.654750
- 535 Macciocchi, S. N., Diamond, P. T., Alves, W. M., & Mertz, T. (1998). Ischemic stroke: Relation of  
536 age, lesion location, and initial neurologic deficit to functional outcome. *Archives of*  
537 *Physical Medicine and Rehabilitation*, 79(10), 1255-1257.  
538 doi:[https://doi.org/10.1016/S0003-9993\(98\)90271-4](https://doi.org/10.1016/S0003-9993(98)90271-4)
- 539 Majerus, S., Péters, F., Bouffier, M., Cowan, N., & Phillips, C. (2018). The Dorsal Attention  
540 Network Reflects Both Encoding Load and Top-down Control during Working Memory.  
541 *Journal of Cognitive Neuroscience*, 30(2), 144-159. doi:10.1162/jocn\_a\_01195
- 542 Marek, S., Tervo-Clemmens, B., Calabro, F. J., Montez, D. F., Kay, B. P., Hatoum, A. S., . . .  
543 Dosenbach, N. U. F. (2020). Towards Reproducible Brain-Wide Association Studies.  
544 *bioRxiv*, 2020.2008.2021.257758. doi:10.1101/2020.08.21.257758

- 545 MathWorks, I. (2018). *MATLAB : the language of technical computing : computation,*  
546 *visualization, programming*: Natwick : Math Works Inc., 2018.
- 547 McIntosh, A. R., & Lobaugh, N. J. (2004). Partial least squares analysis of neuroimaging data:  
548 applications and advances. *NeuroImage, 23 Suppl 1*, S250-263.  
549 doi:10.1016/j.neuroimage.2004.07.020
- 550 McKiernan, K. A., Kaufman, J. N., Kucera-Thompson, J., & Binder, J. R. (2003). A Parametric  
551 Manipulation of Factors Affecting Task-induced Deactivation in Functional Neuroimaging.  
552 *Journal of Cognitive Neuroscience, 15*(3), 394-408. doi:10.1162/089892903321593117
- 553 Megías, A., Cándido, A., Maldonado, A., & Catena, A. (2018). Neural correlates of risk perception  
554 as a function of risk level: An approach to the study of risk through a daily life task.  
555 *Neuropsychologia, 119*, 464-473.  
556 doi:<https://doi.org/10.1016/j.neuropsychologia.2018.09.012>
- 557 Menon, V., & Uddin, L. Q. (2010). Saliency, switching, attention and control: a network model of  
558 insula function. *Brain Structure and Function, 214*(5), 655-667. doi:10.1007/s00429-010-  
559 0262-0
- 560 Munsch, F., Sagnier, S., Asselineau, J., Bigourdan, A., Guttmann Charles, R., Debruxelles, S., . . .  
561 Tourdias, T. (2016). Stroke Location Is an Independent Predictor of Cognitive Outcome.  
562 *Stroke, 47*(1), 66-73. doi:10.1161/STROKEAHA.115.011242
- 563 Munthe-Kaas, R., Aam, S., Saltvedt, I., Wyller Torgeir, B., Pendlebury Sarah, T., Lydersen, S., &  
564 Ihle-Hansen, H. (2021). Test Accuracy of the Montreal Cognitive Assessment in Screening  
565 for Early Poststroke Neurocognitive Disorder. *Stroke, 52*(1), 317-320.  
566 doi:10.1161/STROKEAHA.120.031030
- 567 Nakaoku, Y., Oishi, N., Hase, Y., Hase, M., Saito, S., Mitsueda, T., . . . Takahashi, R. (2018).  
568 Montreal Cognitive Assessment score correlates with regional cerebral blood flow in post-  
569 stroke patients. *Clinical Neurology and Neurosurgery, 174*, 68-74.  
570 doi:<https://doi.org/10.1016/j.clineuro.2018.09.004>
- 571 Nasreddine, Z. S., Phillips, N. A., Bédirian, V., Charbonneau, S., Whitehead, V., Collin, I., . . .  
572 Chertkow, H. (2005). The Montreal Cognitive Assessment, MoCA: A Brief Screening Tool  
573 For Mild Cognitive Impairment. *Journal of the American Geriatrics Society, 53*(4), 695-  
574 699. doi:10.1111/j.1532-5415.2005.53221.x
- 575 Paulus, M. P., Feinstein, J. S., Leland, D., & Simmons, A. N. (2005). Superior temporal gyrus and  
576 insula provide response and outcome-dependent information during assessment and action  
577 selection in a decision-making situation. *NeuroImage, 25*(2), 607-615.  
578 doi:<https://doi.org/10.1016/j.neuroimage.2004.12.055>
- 579 Pendlebury, S. T. (2009). Stroke-related dementia: Rates, risk factors and implications for future  
580 research. *Maturitas, 64*(3), 165-171. doi:<https://doi.org/10.1016/j.maturitas.2009.09.010>
- 581 Ptak, R., Bourgeois, A., Cavelti, S., Doganci, N., Schnider, A., & Iannotti, G. R. (2020). Discrete  
582 Patterns of Cross-Hemispheric Functional Connectivity Underlie Impairments of Spatial  
583 Cognition after Stroke. *The Journal of Neuroscience, 40*(34), 6638.  
584 doi:10.1523/JNEUROSCI.0625-20.2020
- 585 Rehme, A. K., & Grefkes, C. (2013). Cerebral network disorders after stroke: evidence from  
586 imaging-based connectivity analyses of active and resting brain states in humans. *The*  
587 *Journal of Physiology, 591*(1), 17-31. doi:10.1113/jphysiol.2012.243469
- 588 Richard, G., Kolskär, K. K., Ulrichsen, K. M., Kaufmann, T., Alnæs, D., Sanders, A.-M., . . .  
589 Westlye, L. T. (2020). Brain age prediction in stroke patients: Highly reliable but limited  
590 sensitivity to cognitive performance and response to cognitive training. *NeuroImage:*  
591 *Clinical, 25*, 102159. doi:<https://doi.org/10.1016/j.nicl.2019.102159>
- 592 Rise, H. H., Brune, S., Chien, C., Berge, T., Bos, S. D., Andorra, M., . . . Høgestøl, E. A. (2021).  
593 Brain disconnectome mapping and serum neurofilament light levels in multiple sclerosis.  
594 *medRxiv*, 2021.2004.2021.21255887. doi:10.1101/2021.04.21.21255887

- 595 Rottschy, C., Langner, R., Dogan, I., Reetz, K., Laird, A. R., Schulz, J. B., . . . Eickhoff, S. B.  
596 (2012). Modelling neural correlates of working memory: A coordinate-based meta-analysis.  
597 *NeuroImage*, 60(1), 830-846. doi:<https://doi.org/10.1016/j.neuroimage.2011.11.050>
- 598 Sagnier, S., & Sibon, I. (2019). The new insights into human brain imaging after stroke. *Journal of*  
599 *Neuroscience Research*, n/a(n/a). doi:<https://doi.org/10.1002/jnr.24525>
- 600 Salvalaggio, A., De Filippo De Grazia, M., Zorzi, M., Thiebaut de Schotten, M., & Corbetta, M.  
601 (2020). Post-stroke deficit prediction from lesion and indirect structural and functional  
602 disconnection. *Brain*, 143(7), 2173-2188. doi:10.1093/brain/awaa156
- 603 Shi, L., Zhao, L., Yeung, F. K., Wong, S. Y., Chan, R. K. T., Tse, M. F., . . . Mok, V. C. T. (2018).  
604 Mapping the contribution and strategic distribution patterns of neuroimaging features of  
605 small vessel disease in poststroke cognitive impairment. *Journal of Neurology,*  
606 *Neurosurgery & Psychiatry*, 89(9), 918. doi:10.1136/jnnp-2017-317817
- 607 Siegel, J. S., Ramsey, L. E., Snyder, A. Z., Metcalf, N. V., Chacko, R. V., Weinberger, K., . . .  
608 Corbetta, M. (2016). Disruptions of network connectivity predict impairment in multiple  
609 behavioral domains after stroke. *Proceedings of the National Academy of Sciences*, 113(30),  
610 E4367. doi:10.1073/pnas.1521083113
- 611 Stam, C. J. (2014). Modern network science of neurological disorders. *Nature Reviews*  
612 *Neuroscience*, 15, 683. doi:10.1038/nrn3801
- 613 Stolwyk Renerus, J., O'Neill Megan, H., McKay Adam, J. D., & Wong Dana, K. (2014). Are  
614 Cognitive Screening Tools Sensitive and Specific Enough for Use After Stroke? *Stroke*,  
615 45(10), 3129-3134. doi:10.1161/STROKEAHA.114.004232
- 616 Thiebaut de Schotten, M., Foulon, C., & Nachev, P. (2020). Brain disconnections link structural  
617 connectivity with function and behaviour. *Nature Communications*, 11(1), 5094.  
618 doi:10.1038/s41467-020-18920-9
- 619 Uddin, L. Q., Yeo, B. T. T., & Spreng, R. N. (2019). Towards a Universal Taxonomy of Macro-  
620 scale Functional Human Brain Networks. *Brain topography*, 32(6), 926-942.  
621 doi:10.1007/s10548-019-00744-6
- 622 Ulrichsen, K. M., Kolskär, K. K., Richard, G., Alnæs, D., Dørum, E. S., Sanders, A.-M., . . .  
623 Westlye, L. T. (2020). Brain disconnectivity mapping of post-stroke fatigue. *bioRxiv*,  
624 2020.2011.2013.380972. doi:10.1101/2020.11.13.380972
- 625 van den Heuvel, M. P., & Sporns, O. (2019). A cross-disorder connectome landscape of brain  
626 dysconnectivity. *Nature Reviews Neuroscience*, 20(7), 435-446. doi:10.1038/s41583-019-  
627 0177-6
- 628 Vatansever, D., Manktelow, A., Sahakian, B. J., Menon, D. K., & Stamatakis, E. A. (2018). Default  
629 Mode Network Engagement Beyond Self-Referential Internal Mentation. *Brain*  
630 *Connectivity*, 8(4), 245-253. doi:10.1089/brain.2017.0489
- 631 Vicentini, J. E., Weiler, M., Casseb, R. F., Almeida, S. R., Valler, L., de Campos, B. M., & Li, L.  
632 M. (2021). Subacute functional connectivity correlates with cognitive recovery six months  
633 after stroke. *NeuroImage. Clinical*, 29, 102538-102538. doi:10.1016/j.nicl.2020.102538
- 634 Vossel, S., Geng, J. J., & Fink, G. R. (2014). Dorsal and ventral attention systems: distinct neural  
635 circuits but collaborative roles. *The Neuroscientist : a review journal bringing neurobiology,*  
636 *neurology and psychiatry*, 20(2), 150-159. doi:10.1177/1073858413494269
- 637 Wang, R., Benner, T., Sorensen, A. G., & Wedeen, V. J. (2007). Diffusion Toolkit: A Software  
638 Package for Diffusion Imaging Data Processing and Tractography *Proceedings of the*  
639 *International Society for Magnetic Resonance in Medicine*, 15.
- 640 Warren, D. E., Power, J. D., Bruss, J., Denburg, N. L., Waldron, E. J., Sun, H., . . . Tranel, D.  
641 (2014). Network measures predict neuropsychological outcome after brain injury.  
642 *Proceedings of the National Academy of Sciences*, 111(39), 14247.  
643 doi:10.1073/pnas.1322173111
- 644 Wilk, H. A., Ezekiel, F., & Morton, J. B. (2012). Brain regions associated with moment-to-moment  
645 adjustments in control and stable task-set maintenance. *NeuroImage*, 59(2), 1960-1967.  
646 doi:<https://doi.org/10.1016/j.neuroimage.2011.09.011>

- 647 Willer, L., Pedersen, P. M., Forchhammer, H. B., & Christensen, H. (2016). Cognitive assessment  
648 at bedside for iPad: A preliminary validation of a novel cognitive test for stroke patients.  
649 *European Stroke Journal*, 1(4), 294-301. doi:10.1177/2396987316665233
- 650 Ystad, M., Hodneland, E., Adolfsdottir, S., Haász, J., Lundervold, A. J., Eichele, T., & Lundervold,  
651 A. (2011). Cortico-striatal connectivity and cognition in normal aging: A combined DTI and  
652 resting state fMRI study. *NeuroImage*, 55(1), 24-31.  
653 doi:<https://doi.org/10.1016/j.neuroimage.2010.11.016>
- 654 Zhao, L., Biesbroek, J. M., Shi, L., Liu, W., Kuijf, H. J., Chu, W. W. C., . . . Wong, A. (2017).  
655 Strategic infarct location for post-stroke cognitive impairment: A multivariate lesion-  
656 symptom mapping study. *Journal of Cerebral Blood Flow & Metabolism*, 38(8), 1299-1311.  
657 doi:10.1177/0271678X17728162  
658
